# Supplementary material
Source: publisher figshare collection journal article supplement (https://gsajournals.figshare.com/articles/dataset/_/13191527)
Supplement: Supplementary file 1 [file 1]

## Sheet: Fig 1.
A							B							C
Raw Pupal Volume							Raw Pupal Volume							Raw Pupal Volume
Female			Male				Female			Male				Female			Male
dilp2>+	+>rpr	dilp2>rpr	dilp2>+	+>rpr	dilp2>rpr		dilp2>+	+>Kir2.1	dilp2>Kir2.1	dilp2>+	+>Kir2.1	dilp2>Kir2.1		w1118	ilp2,3,5	ilp1-4,5	w1118	ilp2,3,5	ilp1-4,5
1.90811	2.05995	1.21179	1.38048	1.64419	0.958579		1.9218	1.95327	1.08369	1.51926	1.568	0.882328		1.78118	1.20803	1.07264	1.46024	0.867805	0.994177
1.69505	2.01495	1.14211	1.37409	1.67951	1.03359		1.79631	2.00711	1.03743	1.30231	1.60628	0.923518		1.9044	1.20467	1.1455	1.45385	0.834692	0.756194
1.77168	2.09876	1.22774	1.38073	1.57444	0.909501		1.85316	1.96182	1.06376	1.29379	1.56995	0.924857		1.74753	1.2631	1.028	1.39247	0.92736	0.686775
1.85337	2.00615	1.21337	1.39948	1.58574	0.913654		1.82342	2.01252	1.31383	1.34007	1.50674	0.898454		1.9644	1.06421	1.102	1.74357	0.875907	0.967038
1.69224	1.89082	1.17122	1.64554	1.5241	0.956542		1.9562	1.92585	1.16291	1.39497	1.61147	0.945675		1.67556	1.15374	1.0182	1.37809	0.793649	0.880015
1.60752	1.95064	1.22587	1.56618	1.54666	0.937632		1.80261	2.10915	1.00653	1.45725	1.6138	0.899967		1.89901	1.05369	1.22179	1.45999	0.957893	0.711558
1.77216	2.06568	1.2201	1.40506	1.4721	1.17061		1.85444	2.22559	1.06893	1.47484	1.64487	0.979222		1.94526	1.20404	1.25415	1.36167	0.892215	0.83456
1.87264	2.1419	1.2392	1.38986	1.53472	0.819661		1.89646	2.13704	1.10106	1.38931	1.5291	0.875038		1.92955	1.23207	0.834608	1.42168	0.843466
1.75931	2.01767	1.1254	1.35165	1.63528	0.942507		1.82152	1.93015	1.10074	1.48722	1.49627	1.01098		1.92617	1.10413	1.03895	1.41981	0.904306
1.65227	2.0129	1.16822	1.3308	1.64203	0.964322		1.92412	1.96128	1.12998	1.42015	1.61271	0.909149		1.89845	1.18459	0.997097	1.36584	0.88432
1.78652	2.01439	1.21627	1.43759	1.61723	1.05363		1.7077	2.01049	1.16509	1.41379	1.50444	0.993759		1.83917	1.12685	1.26075	1.39434	0.777409
1.66417	2.08664	0.961562	1.38863	1.5961	0.989649		1.93559	2.22133	1.18327	1.40808	1.54169	0.901827		1.67731	1.26244	0.83013	1.09196	0.922488
1.75653	1.81772	1.01718	1.43611	1.63089	0.960747		1.78454	2.05212	1.16248	1.39844	1.5193	0.942487		1.97626	0.88185	1.11917	1.41105	0.972495
1.6812	2.07691	1.13888	1.34777	1.52852	0.975628		1.72466	2.07691	1.02474	1.47002	1.53009	0.945352		1.84924	1.23063	1.13466	1.3788	0.921223
1.78238	1.98928	1.13113	1.35506	1.52043	1.06818		1.82391	1.93208	1.11191	1.47032	1.53717	0.876239		1.90553	0.695301	1.26176	1.43387	0.936629
1.75388	2.01489	1.19237	1.35244	1.44223			1.92478	1.93313	1.1056	1.36429	1.56595	0.929292		1.8216	1.26627	1.19204	1.42886	1.01825
1.73597	2.01175	1.22629	1.41132	1.51442			1.75707	2.03606	1.06426	1.40713	1.62327	0.830654		1.95023	1.28292	1.23089	1.37149	1.08081
1.8882	1.96469	1.11292	1.38128	1.58009			1.82384	2.05339	1.18768	1.74782	1.63895	0.879654		1.91354	1.06719	1.05662	1.4271	0.997722
1.61226	2.15753	1.17129	1.47532	1.48585			1.78521	1.99656	1.2001	1.46871	1.57627	0.908195		1.87691	0.936285	1.10614	1.53293	0.925194
1.71802	1.95871	1.15311	1.4274	1.6042			1.80082	2.16506	1.14338	1.45178	1.55471	0.909081		1.95253	1.16911	0.98479	1.44966	1.03845
1.96407	2.00881	1.05332	1.4286	1.6469			1.93785	1.96219	0.913596	1.31515	1.61126	0.900176		1.71352	1.16461	1.19327	1.41749	1.03661
1.6639	1.93522	1.20703	1.36381	1.57432			2.05228	2.18604	1.26881	1.39772	1.50231	0.957144		1.77595	1.12845	1.06098	1.4807	1.03981
1.78884	2.03961	1.21517	1.53772	1.36593			1.85459	2.00733	1.20835	1.46457	1.61829	0.786576		1.88484	1.07148	0.862128	1.45173	1.03855
1.82209	2.08097	1.09401	1.44805	1.55471			1.93744	2.05639	1.06554	1.36589	1.64143	0.940521		1.8542	1.00893	1.17176	1.4493	0.852877
1.72124	1.93225	1.11862	1.46108	1.50029			1.76736	2.09607	1.10286	1.4579	1.64503	0.886938		1.91265	1.21284	1.12	1.33483	0.95215
1.74302	1.97368	1.07744	1.43774	1.52875			1.97036	2.11395	1.19424	1.43825	1.58496	0.936517		1.87704	1.06544	1.10205	1.47882
1.81786	1.86265	1.16299	1.32713	1.71609			1.78177	2.10863	1.11115	1.36472	1.62701	0.905683		1.90616	1.17262	1.17732	1.39355
1.84268	2.02429	1.18848	1.47961	1.44692			1.67743	2.12798	1.11414	1.41844	1.52063	0.893322		1.86929	0.945515	1.13679	1.47656
1.80689	1.88949	1.2246	1.35829	1.54819			1.79573	1.99989	1.15836	1.43075	1.68392	0.96627		1.92076	1.15522	1.10207	1.50631
1.96942	2.03172	1.13601	1.3276	1.55755			1.86946	2.02526	1.12332	1.52379	1.50921	0.810548		1.78971	1.13026	1.0708	1.52278
1.6537	1.98501	1.20197	1.44464	1.50787			1.8124	2.06586	1.14515	1.45277	1.6317	0.97453		2.10471	1.05635	1.08951	1.50459
1.74628	1.99614	1.08529	1.50135	1.5854			1.82978	2.13136	1.21568	1.50095	1.55214			1.75961	1.01428	1.15639	1.38356
1.65002	1.94629	1.07563	1.47323	1.60448			1.86723	1.99023	1.15904	1.38336	1.65068			1.87256	1.26501	1.1082	1.35952
1.77055	1.9856	1.09003	1.30895	1.61399			2.18625	2.07652	1.1573	1.48156	1.57541			1.74324	1.30561	1.07281	1.51759
1.75787		1.09655	1.41033	1.60293			1.96753	2.01349	1.24311	1.36848	1.66535			1.96884	1.34955	1.08625	1.4165
		1.11532	1.25619	1.54009			1.72503	1.99642	1.08606	1.49877	1.64549			1.77407			1.30936
		1.09022	1.38068	1.69229			1.87861	2.00421	1.04127	1.41208	1.5454			1.83797			1.32233
		1.1003	1.34321	1.57335			1.75832	2.00888	1.14203	1.40672	1.70926			1.88875			1.68829
		1.17724	1.40587	1.63804			1.42089	1.99465	1.08111	1.32856	1.7149			1.88111			1.49627
		1.16229	1.4264	1.66416			1.86773	2.09587	1.11874	1.44135	1.60344			1.96856			1.36191
		1.0776	1.43668	1.67113			1.8378	2.08824	1.08843	1.38449	1.6764			1.88797			1.50507
		1.25436	1.32309	1.59161				1.98048	1.10937	1.40045	1.56359			1.9777			1.379
		1.17765	1.37587	1.66124				2.14145	1.16134	1.48002	1.8687			1.87003			1.38917
		1.09092	1.3321	1.59378				2.10015	1.12302	1.41032	1.68411			1.84915			1.46367
		1.16681	1.47444	1.57062				1.94879	1.27359	1.65089	1.61202			1.72032			1.30961
		1.14475	1.35903	1.59292				2.06078	1.07315	1.38278				1.84965			1.28028
		1.17826	1.38865	1.53274				2.0133	1.05814	1.51166				1.85245			1.56556
		1.07299	1.40457	1.57924				2.05954	1.06823	1.32621				1.85056			1.34838
		1.203	1.42704	1.61131				2.13064	1.05105	1.40708				1.85746			1.35607
		1.16375	1.41523	1.56741				2.10607	1.10932	1.56604				1.81243			1.56693
		1.14261	1.35732	1.50442				2.09545	1.1238	1.39577				1.92301			1.49811
		1.12314	1.45154	1.59471				1.94257	1.18802	1.3964				1.98876			1.27422
		1.19351	1.37973	1.5514				1.96112	1.00302	1.51652				2.09074			1.40627
		1.21315		1.63057				1.97089	1.08711					1.82717			1.35896
		1.14603		1.76305				2.17462	1.10889					1.94604			1.41114
		1.12978		1.89686					1.18207					1.74722			1.40274
		1.20673		1.53087					0.984897								1.32428
		1.13474		1.5226					1.1898								1.44299
		1.20865		1.61262					1.01227								1.47095
		1.2577		1.57382					1.01902								1.51748
		1.19608		1.46643					1.16473								1.33355
		1.20123		1.56633					1.08247								1.41864
		1.14144		1.64321					1.07957								1.54809
		1.14628		1.53599					1.14731								1.43201
		1.02213		1.54901					1.15544								1.41491
		1.14708		1.59604					1.10393								1.46675
				1.60601					1.09717								1.31081
				1.57008					1.03666								1.4364
				1.72868					1.13162								1.41028
				1.6282					1.13104								1.34031
				1.59052													1.41442
																	1.42572
																	1.464
																	1.34098

## Sheet: Fig 2.
A							B			C							D
Raw Pupal Volume							Raw Pupal Volume			Raw Pupal Volume							Raw Pupal Volume
Female							Female			Male							Male
w1118	ilp1	ilp3	ilp4	ilp5	ilp7		yw	ilp641		w1118	ilp1	ilp3	ilp4	ilp5	ilp7		yw	ilp641
1.99503	1.97455	1.83266	1.89304	1.58902	1.89281		2.00853	2.06674		1.40946	1.41039	1.25387	1.26202	1.44523	1.40684		1.47503	1.60767
1.93833	1.86217	1.67257	1.84194	1.63049	1.92351		2.19299	2.07096		1.43334	1.3974	1.47709	1.46518	1.34522	1.51778		1.50982	1.55818
1.75234	1.72183	1.79075	1.89808	1.63235	1.8007		2.04393	2.18549		1.33899	1.39758	1.4479	1.51419	1.42693	1.3625		1.72263	1.61753
1.98692	1.43164	1.97075	1.65262	1.70735	1.95807		2.16511	2.14906		1.41985	1.21563	1.46968	1.48591	1.43456	1.33748		1.63806	1.5655
1.76373	1.90606	1.64042	1.80499	1.97117	1.70248		2.06166	2.08117		1.40641	1.49778	1.39591	1.52814	1.3764	1.42905		1.6677	1.56299
1.94587	1.6808	1.88886	1.75804	1.8031	1.86285		1.91462	1.91958		1.31509	1.273	1.36644	1.35102	1.35383	1.32587		1.67414	1.65197
1.78651	1.72477	1.8452	2.13591	1.71565	1.67664		2.02692	1.44941		1.43422	1.45724	1.39495	1.34673	1.46785	1.62769		1.76424	1.72146
1.83804	1.76329	1.88567	1.63878	1.67217	1.7477		1.98704	2.17154		1.49942	1.36124	1.54719	1.48173	1.50364	1.39564		1.46612	1.7429
1.8459	1.72168	1.92162	2.02946	1.58369	1.81546		2.0841	1.97549		1.52205	1.47616	1.62403	1.37272	1.46601	1.47533		1.7665	1.73191
1.72174	1.62245	1.80411	1.86928	1.71762	1.68342		1.82941	2.14326		1.34137	1.46148	1.5133	1.3384	1.30743	1.47587		1.70813	1.47279
1.88132	1.91598	1.85991	1.92377	1.60124	1.84179		2.15433	2.12737		1.42101	1.6619	1.43452	1.4434	1.46112	1.41897		1.7532	1.74732
1.89409	1.69327	2.04641	1.83356	1.68549	1.97813		2.28107	2.14875		1.52363	1.5245	1.30504	1.3134	1.35915	1.49604		1.57895	1.65473
2.05165	1.73138	1.83582	1.89257	1.52377	1.8166		1.9109	2.05567		1.48058	1.33679	1.43051	1.64334	1.27571	1.52385		1.63211	1.60121
2.15739	1.55798	1.84688	1.72995	1.6908	2.04727		2.02271	1.52456		1.43314	1.35187	1.43902	1.59188	1.44858	1.39		1.6051	1.46719
1.91363	1.87313	1.87008	1.68742	1.68273	1.73094		2.22376	1.97881		1.45102	1.451	1.42665	1.39035	1.42408	1.4419		1.60998	1.72342
1.79938	1.86681	1.79752	1.98123	1.64481	1.817		2.1808	1.97457		1.31676	1.34837	1.55535	1.53016	1.52242	1.43399		1.7254	1.68051
1.92487	1.84768	1.78768	1.83048	1.76999	1.98689		2.09735	2.04327		1.3023	1.47877	1.42017	1.45751	1.46349	1.39076		1.67051	1.56712
2.02271	1.78565	1.88963	1.90542	1.72066	1.81841		2.06192	1.9769		1.2738	1.28628	1.48952	1.4558	1.43656	1.36702		1.84439	1.80288
1.7548	1.69871	1.71823	1.88226	1.66164	1.71349		2.18067	2.09586		1.42691	1.46235	1.38968	1.46929	1.37936	1.41387		1.79267	1.53401
1.88428	1.6449	1.66912	1.75213	1.71376	1.84046		1.84791	2.12163		1.38285	1.40134	1.49101	1.45187	1.51495	1.41519		1.57242	1.64594
1.65281	1.71032	1.797	1.57572	1.80331	1.79028		2.30429	2.01021		1.30231	1.20864	1.37097	1.51355	1.45171	1.34644		1.70342	1.49701
1.82718	1.99451	1.82315	1.79623	1.62017	1.83884		2.07452	2.07343		1.42144	1.28315	1.52819	1.41761	1.31533	1.52221		1.73543	1.54371
1.92895	1.80999	1.89412	1.79588	1.80201	1.58115		2.02202	2.01437		1.44266	1.47189	1.46065	1.49555	1.45302	1.47758		1.72251	1.6229
1.75474	1.82195	1.85936	1.81482	1.71915	1.80522		1.94982	2.19907		1.36359	1.42573	1.45061	1.43776	1.51577	1.59724		1.48646	1.62061
1.96234	1.6867	1.79166	1.83102	1.5602	1.78837		2.21126	2.24654		1.35778	1.38533	1.31807	1.33109	1.34999	1.3523		1.56321	1.46105
1.81957	2.01444	1.87096	1.8906	1.6448	1.6068		2.21974	2.31505		1.27597	1.44676	1.57532	1.4251	1.50964	1.32071		1.70453	1.63565
1.8337	1.46627	2.02672	1.92908	1.64823	1.92002		1.92298	2.04096		1.38422	1.47302	1.45749	1.42393	1.52535	1.4098		1.69556	1.49364
1.98866	1.60324	1.69994	1.95352	1.73197	1.70003		1.94443	2.20613		1.54498	1.28869	1.44667	1.35537	1.41201	1.48689		1.62616	1.51456
1.96423	1.64962	1.79472	1.59111	1.70464	1.87317		1.92318	1.98794		1.45664	1.16763	1.39169	1.49032	1.43025	1.23084		1.79199	1.64449
1.99406	1.79274	1.81843	1.78791	1.81393	1.72663		2.0569	1.98962		1.24756	1.40815	1.41644	1.44219	1.28716	1.48746		1.77275	1.55775
1.89778	1.76906	1.81645	1.98241	1.6572	1.90244		2.12331	2.2899		1.39557	1.35713	1.52715	1.39358	1.41594	1.40957		1.68148	1.51712
1.78862	1.659	1.79069	1.83215	1.77703	1.86825		2.02227	2.28352		1.43804	1.48075	1.3047	1.52273	1.32311	1.39459		1.55056	1.64899
1.89108	1.91375	1.80172	1.68335	1.64856	1.8202		2.12676	2.18445		1.44028	1.25644	1.41084	1.54059	1.73872	1.5154		1.6563	1.60264
1.99927	1.63435	2.0522	2.02577	1.84605	1.61584		2.15011	2.05113		1.45031	1.16352	1.34826	1.41134	1.52765	1.59463		1.78691	1.77378
1.93929	1.62136	1.95106	1.76952	1.65515	1.81384		1.95948	2.10535		1.50782	1.33981	1.42575	1.29977	1.45179	1.40933		1.67304	1.57815
2.01545	1.75754	1.80049	1.82013	1.72411	2.04415		2.04725	2.23228		1.30642	1.39406	1.54431	1.27953	1.45336	1.39461		1.83514	1.59807
2.03144	1.67327	1.69433	1.81693	1.76532	1.89473		2.22332	2.00605		1.48828	1.42027	1.46498	1.5747	1.26127	1.38865		1.65202	1.62077
1.92397	1.68057	1.91972	1.69382	1.68346	2.02543		2.12552	2.22571		1.30213	1.32994	1.46704	1.61134	1.44329	1.39988		1.67697	1.40383
2.05413	1.65579	1.75747	1.79584	1.76052	1.67798		2.00758	1.96843		1.45796	1.31714	1.49469	1.47542	1.4129	1.20465		1.64949	1.67994
1.88386	1.68268	1.83864	1.83131	1.70442	1.79445		2.11689	2.05117		1.44281	1.46999	1.36719	1.48739	1.38322	1.51333		1.67234	1.54668
1.8289	1.72832	1.63455	1.84448	1.75753	1.80055		2.1374	2.0333		1.3425	1.40863	1.39338	1.54889	1.35238	1.38675		1.65145	1.65108
1.97148	1.42232	1.72933	1.56892	1.61063	1.73616		2.02331			1.38908	1.49643	1.48589	1.41017	1.46833	1.50002		1.71547	1.3821
1.97947	1.71337	1.96323	1.73669	1.39904	1.74645		2.21362			1.59616	1.42301	1.44928	1.51677	1.43415	1.46098		1.68951	1.59196
1.66311	1.8606	1.92941	1.78102	1.74269	1.6233		2.14929			1.32075	1.39109	1.55585	1.56199	1.27773	1.5033		1.5895	1.68874
1.91719	1.75078	1.89188	1.99353	1.66656	1.74427		1.97342			1.3688	1.33083	1.56394	1.33789	1.4904	1.34771		1.75234	1.68744
2.05232	1.74343	1.90316	1.86815	1.82366	1.75426		2.13031			1.4532	1.2277	1.47458	1.49371	1.42885	1.39465		1.59824	1.80269
1.74294	1.80125	1.80884	1.93912	1.5475	1.88021		2.03057			1.4049	1.25147	1.29157	1.32542	1.46121	1.4529		1.61695	1.6099
1.84218	1.53146	1.9111	1.86701	1.51668	1.70586		1.94423			1.54088	1.43359	1.36744	1.63057	1.38948	1.37206		1.6396	1.67678
2.0725	1.54984	1.79057	1.90037	1.35606	1.71799		2.10732			1.44436	1.40204	1.45064	1.46072	1.5652	1.45561		1.58855	1.50941
1.86119	1.73559	1.83966	1.65746	1.70444	1.96121		1.98323			1.35026	1.41934	1.42104	1.42453	1.69188	1.51196		1.67712	1.72962
1.87586	1.90187	1.87058	1.87741	1.5678	1.78164		2.06563			1.44575	1.6872	1.49651	1.47906	1.36034	1.34557		1.63005	1.57062
1.96803	1.64067	1.89349	1.71992	1.63467	1.81349		2.02224			1.54047	1.43844	1.4611	1.53996	1.46476	1.46271		1.82776	1.51957
1.87736	1.66958	1.8411	2.06884	1.33291	1.71481		2.30622			1.35726	1.38679	1.57091	1.48554	1.43812	1.38851		1.75631	1.62092
1.95358	1.69044	1.7523	1.85797	1.57932	1.89605		1.97364			1.35247	1.60733	1.39375	1.34713	1.53621	1.6252		1.71097	1.7606
1.85666	1.87353	1.87535	1.95997	1.67189	1.70914		2.00298			1.40425	1.4533	1.45256	1.31919	1.43927	1.64001		1.66002	1.56238
1.95902	1.85649	1.77858	1.73659	1.85551	1.77448		1.90304			1.49079	1.42958	1.41604	1.38914	1.35829	1.52197		1.67061	1.57597
1.76483	1.87618	1.8114	1.93718	1.76775	1.86786		2.04944			1.35249	1.38282	1.58686	1.4168	1.43965	1.57379		1.60044	1.75148
1.96407	1.7934	1.7586	1.92986	1.65194	1.75761		2.12356			1.38444	1.29418	1.51221	1.252	1.40221	1.32374		1.66567	1.62915
1.79537	1.75046	1.88209	1.96594	1.6345	1.71823		1.95625			1.54992	1.28283	1.44575	1.4963	1.26844	1.34421		1.66562	1.79669
1.78822	1.9007	1.84146		1.65903	1.75122		2.03108			1.43572	1.50255	1.54866	1.42772	1.4561	1.43067		1.31507	1.72772
1.94094	1.71587	1.74163		1.69078	1.68607		2.09818			1.44476	1.55942	1.49326	1.68169	1.41715	1.44775		1.5788	1.6399
1.79334	1.81419	1.74413		1.50078	1.72394		2.15548			1.49476	1.50594	1.57796	1.59775	1.65475	1.30625		1.7525	1.67084
2.04117	1.66434	1.68274		1.93754	1.87161		2.12846			1.4178	1.48924	1.5505	1.52862	1.507	1.7365		1.71295	1.54352
1.76999	1.90403	1.8102		1.75629			2.0797			1.36251	1.60235	1.42279	1.5046	1.42404	1.38288		1.55706	1.64009
1.79795	1.78565	1.69967		1.81753			2.02452			1.47371	1.5319	1.35743	1.38818	1.4053	1.53016		1.79113
1.84961	1.63909	1.89589		1.83871			2.15583			1.52913	1.38511	1.378	1.42098	1.37017	1.42259		1.7547
1.90148	1.81474	1.7158		1.77226			2.29128			1.45531	1.51589	1.45002		1.56619	1.64625		1.68196
1.89248	1.73621	1.68653		1.66526			2.27266			1.50802	1.489	1.35322		1.38858	1.44553		1.85702
1.87182	1.62021	1.79238		1.77016			2.16326			1.48522	1.22353	1.37323		1.40287	1.38245		1.72121
1.86985		1.73679		1.798			1.95933			1.43336	1.46687	1.55109		1.42585	1.49445		1.75402
1.8198		1.91407					2.00382			1.56686	1.39748	1.36759		1.41064	1.57206
1.93756		1.80749					2.16583			1.54195	1.53733	1.39493		1.44799	1.45953
1.97958		1.77167					2.08451			1.40182	1.41087	1.445		1.37728
1.96116		1.67056					2.06596			1.38886	1.46365	1.46891		1.36974
										1.42459	1.43516
										1.42377	1.34005
										1.44182
										1.45465
										1.4477

## Sheet: Fig 3.
A					B
Raw Pupal Volume					Raw Pupal Volume
Female		Male			Female			Male
w1118	Sdr1	w1118	Sdr1		r4>+	+>UAS-Imp-L2-RNAi	r4>UAS-Imp-L2-RNAi	r4>+	+>UAS-Imp-L2-RNAi	r4>UAS-Imp-L2-RNAi
1.74329	2.44722	1.53518	2.00312		2.014	1.95197	2.05298	1.57632	1.43621	1.72056
1.83685	2.501	1.44683	1.91231		1.86564	1.85771	1.97452	1.47971	1.428	1.61176
1.96557	2.4452	1.37777	2.1486		2.05714	1.8248	2.01689	1.50494	1.64844	1.74156
2.2457	2.03655	1.47937	1.85876		2.11178	1.93639	2.15033	1.5234	1.52004	1.73365
2.05523	2.39019	1.40991	2.17282		2.02087	1.79578	2.12294	1.5517	1.42058	1.57073
1.96097	2.52291	1.43971	2.1541		2.09531	1.76956	2.07468	1.46608	1.47032	1.60684
1.82827	2.45794	1.49903	1.94709		1.92996	1.76576	1.98824	1.39536	1.43453	1.67111
1.96425	2.41264	1.46883	1.98615		1.96424	1.91703	1.94447	1.54105	1.52249	1.66708
1.97846	2.40052	1.49888	1.99793		1.90381	1.83364	1.84898	1.45834	1.60139	1.58409
1.88017	2.25827	1.09257	1.8763		1.93841	1.85216	2.06375	1.6278	1.58741	1.59118
2.099	2.28859	1.47181	2.07476		2.03039	1.82217	1.8371	1.44608	1.47535	1.71241
1.91567	2.61219	1.40394	1.93105		2.03236	1.8748	1.98695	1.54547	1.50304	1.61398
1.9747	2.49325	1.37628	1.9898		1.7199	1.91356	2.00067	1.53314	1.32806	1.69797
1.81778	2.32002	1.32464	2.09675		2.07066	1.84718	1.56583	1.4992	1.40128	1.52476
1.76308	2.42705	1.55792	1.90835		2.29347	1.9473	1.94889	1.61437	1.40755	1.58802
1.94829	2.6268	1.54254	1.97672		2.08108	1.7804	1.97112	1.58179	1.46368	1.60909
1.92811	2.07928	1.50545	1.94157		1.79761	1.84295	1.81305	1.58478	1.46434	1.70741
1.94777	2.54929	1.58413	1.94381		2.04623	1.74796	1.96989	1.45979	1.50504	1.55282
1.88036	2.36549	1.434	1.93075		1.94392	1.8315	1.93597	1.57294	1.48164	1.65595
2.05991	2.34117	1.66267	1.98124		1.95575	1.92423	1.84406	1.59245	1.50277	1.71782
2.04823	2.55249	1.52304	1.94901		2.03344	1.96058	1.87575	1.44588	1.55818	1.53162
1.30077	2.44182	1.14706	2.13746		1.96126	1.94353	1.94763	1.48598	1.57322	1.63496
1.92603	2.4445	1.43822	2.01491		2.0341	1.87546	1.83178	1.4869	1.52709	1.75858
2.04898	2.46316	1.40875	1.88391		2.04797	1.8383	1.77172	1.53783	1.50516	1.65487
1.34677	2.20269	1.43991	2.09059		2.04047	1.86199	1.95409	1.4107	1.22242	1.60556
1.94905	2.36275	1.37103	1.98898		2.15662	2.00905	1.97463	1.45577	1.43161	1.57335
1.86076	2.41958	1.49385	1.99655		1.94611	1.9237	1.97853	1.38673	1.39274	1.61084
1.88483	2.22676	1.48013	2.05949		2.22888	1.84881	2.00707	1.45952	1.52711	1.67414
1.16848	2.45775	1.45681	2.07183		2.09938	1.7438	1.91051	1.55771	1.33602	1.69382
1.9213	2.52747	1.46534	2.17288		1.94999	1.86532	1.89509	1.5577	1.39952	1.53285
2.00523	2.43365	1.56419	2.09139		2.01601	1.83893	1.94942	1.50192	1.36575	1.66787
1.87339	2.19154	1.42524	2.1104		1.91482	1.90415	2.13114	1.57934	1.43381	1.62405
1.93909	2.50499	1.46152	1.95219		1.95826	1.53711	2.00723	1.44438	1.3457	1.58372
1.86002	2.2529	1.49194	1.79333		2.01052	1.8118	2.05374	1.47084	1.48473	1.55363
2.02023	2.3505	1.37431	2.02782		2.02629	1.80901	2.12697	1.56399	1.52184	1.47661
1.84867	2.48652	1.36759	1.94056		2.09909	1.8053	2.07256	1.52928	1.39929	1.66151
1.97766	2.45575	1.43189	1.9241		1.94793	1.88762	2.15158	1.52431	1.39697	1.66955
1.79454	2.39103	1.53687	1.86436		2.05659	1.88792	1.89245	1.46079	1.45422	1.68715
2.00152	2.49896	1.48693	1.96963		1.80087	1.88854	2.03161	1.43187	1.44684	1.54379
1.96769	2.43617	1.4537	2.10664		2.14025	1.84266	2.05251	1.51619	1.54691	1.62956
1.88179	2.38204	1.46671	2.14938		2.11326	1.98728	2.02656	1.44646	1.46877	1.71345
1.79013	2.38992	1.529	2.07101		1.89625	1.83724	1.92232	1.43257	1.57592	1.50724
1.94168	2.45782	1.4416	1.91421		1.8875	1.97792	1.88455	1.44522	1.42096	1.65841
2.0492	2.55742	1.50924	1.85151		1.99062	1.8417	2.10877	1.55411	1.51367	1.56874
2.03208	2.49986	1.90127	1.94002		2.02787	1.86559	1.85565	1.56461	1.52712	1.70174
1.98443	2.38768	1.55205	1.98399		1.93565	1.7592	1.9547	1.43486	1.58349	1.53682
1.94676	2.54108	1.35851	2.07832		2.05429	1.89293	2.11633	1.51313	1.47672	1.65083
1.84498	2.5294	1.51225	2.152		2.07542	1.94493	2.05768	1.44131	1.5099	1.62507
1.91486	2.47748	1.49319	2.0507		2.00808	1.8725	2.37594	1.4113	1.34607	1.65873
1.95713	2.22358	1.4806	1.89578		1.95555	1.81371	1.98746	1.44456	1.47296	1.65272
1.94429	2.80395	1.54607	2.03418		2.09372	1.77892	2.16649	1.45939	1.56265	1.66494
1.89362	2.49053	1.42722	2.0939		2.04009	1.74008	2.115	1.35961	1.44321	1.61288
1.70064	2.31605	1.39476			2.05628	1.95715	1.94314	1.5292	1.41565	1.57864
1.9778	2.50238	1.00924			2.07432	1.92585	2.51157	1.57848	1.41856	1.62645
1.86833	2.57742	2.0299			1.91737	1.89267	2.1517	1.57595	1.52522	1.8023
1.73664	2.40245	1.50853			1.99012	1.83261	1.86569	1.48939	1.45454	1.59709
1.90907	2.41347	1.52889			2.00234	1.95365	1.90063	1.51603	1.48315	1.67076
1.97963	2.34253	1.5146			1.90488	1.75167	2.12238	1.44291	1.55542	1.56885
1.825	2.32704	1.45943			2.11756	1.5495	2.01798	1.4873	1.36666	1.67519
2.08687	2.4629	1.40453			1.87726	1.90431	1.95032	1.50528	1.50639	1.5852
2.0497	2.28163	1.44305			2.21309	1.80388	2.06639	1.53344	1.57525	1.69697
1.88559	2.28825	1.5298			1.99201	2.01457	1.96578	1.57102	1.4024	1.62498
1.85229	2.57717	1.51107			2.08755	1.8201	1.97189	1.53653	1.47269	1.69417
1.87848	2.29638	1.49604			1.88635	1.90405	1.94439	1.45813	1.46955	1.55794
1.97082	2.37725	1.53502			2.04164	1.94227	2.00016	1.40919	1.47428	1.66792
1.97167	2.51654	1.40419			2.14829	1.82214	2.02682	1.4509	1.52259	1.59956
1.95488	2.59133	1.43776			1.96714	1.8395	2.12746	1.47031	1.49654	1.64174
2.01064	2.3764	1.49538			2.03677	1.8058	2.37695	1.545	1.56535	1.6064
1.84155		1.51012			1.97346	1.85195	1.86471	1.46491	1.50458	1.69566
1.89751		1.51344			2.0306	1.76682	1.871	1.49215	1.47026	1.50714
1.80518		1.52056				1.9506	2.12801	1.56909	1.49872	1.96633
1.85921		1.55275				1.95911	2.14379	1.40142	1.43689	1.51363
1.97992		1.45357				1.96897	1.99903	1.47695	1.51831	1.618
1.81376		1.14856				1.80441	1.84715	1.47596	1.39282	1.658
2.01157		1.48401				1.81441	2.03643	1.48714	1.52947	1.68503
1.8946		1.40936				1.94619	2.05421	1.5771	1.42843	1.40033
1.89762		1.38662				1.97308		1.42277	1.5453	1.74298
1.95512		1.53294				1.93399		1.55578	1.44955	1.66123
1.92366		1.47004				1.79132		1.52782	1.55633	1.65612
1.82042		1.50246				1.90209		1.43041	1.50633	1.59178
		1.49121				1.83966		1.40296	1.52618	1.484
		1.45913				1.99115			1.37588	1.57258
		1.54099				1.85374			1.40381
		1.43158				1.94034			1.38923
		1.47741				1.99336			1.57706
		1.60192				1.84046			1.37577
		1.38031				1.81028			1.5328
		1.29571				1.94613
						1.91699
						1.83628
						1.82061
						1.93223

## Sheet: Fig 4.
A					B					C					D					E					F					G					H
Raw Pupal Volume					Raw Pupal Volume					Raw Pupal Volume					Raw Pupal Volume					Raw Adult Weight					Raw Pupal Volume					Raw Pupal Volume					Raw Adult Weight
Female		Male			Female		Male			Female		Male			Female		Male			Female		Male			Female		Male			Female		Male			Female		Male
w1118	InRE19/InRPZ	w1118	InRE19/InRPZ		w1118	chico1/+	w1118	chico1/+		w1118	Pi3K92E2H1/Df(3R)Pi3K92EA	w1118	Pi3K92E2H1/Df(3R)Pi3K92EA		w1118	Pdk1^4	w1118	Pdk1^4		w1118	Pdk1^4	w1118	Pdk1^4		w1118	Akt^3	w1118	Akt^3		w1118	foxo21/25	w1118	foxo21/25		w1118	foxo21/25	w1118	foxo21/25
1.82442	0.624426	1.36532	0.590193		1.84345	1.74488	1.40742	1.27324		1.82442	1.02086	1.36532	0.796067		1.81533	1.41964	1.60606	1.33097		12	11	7	7		2.07593	0.928352	1.48262	0.709036		1.67452	1.69047	1.34285	1.18882		12	12	8	9
1.75607	0.593617	1.24129	0.516393		1.73724	1.73012	1.5165	1.2542		1.75607	0.990886	1.24129	0.76865		1.95311	1.7657	1.3205	1.28839		11	10	8	7		2.04115	0.968475	1.49896	0.715217		1.58311	1.85315	1.37608	1.31471		12	11	7	9
1.58288	0.642477	1.22223	0.685591		1.98464	1.69885	1.64359	1.31018		1.58288	0.977816	1.22223	0.813621		1.44467	1.68506	1.21151	1.40823		12	10	8	7		2.04262	0.969151	1.4285	0.802629		1.71717	1.88451	1.32687	1.32729		11	11	8	10
1.59613	0.553009	1.10266	0.478276		1.75412	1.65309	1.26431	1.38609		1.59613	0.967557	1.10266	0.77507		1.89786	1.8709	1.36405	1.32893		12	11	8	6		1.82552	0.94631	1.55115	0.812708		1.39646	1.70796	1.32779	1.46182		11	14	8	9
1.63627	0.733884	1.31088	0.630696		1.83664	1.64971	1.41599	1.39105		1.63627	0.97594	1.31088	0.747119		1.85157	1.55284	1.38193	1.27584		11	9	9	7		2.05059	0.946533	1.54173	0.774054		1.73526	1.63414	1.27265	1.41776		12	13	8	10
1.79682	0.628586	1.22943	0.605076		1.61194	1.65163	1.30644	1.2487		1.79682	1.03251	1.22943	0.773766		1.93944	1.70057	1.42282	1.37754		13	10				1.9878	0.998908	1.54353	0.739259		1.71366	1.63486	1.34775	1.55213		12	11	6	9
1.72318	0.642207	1.24713	0.609247		1.78829	1.86196	1.43098	1.28832		1.72318	0.920673	1.24713	0.882505		1.69797	1.64604	1.28117	1.32414			11				1.83023	0.982861	1.51175	0.731157		1.63891	1.53937	1.32761	1.2975		11	12	8	9
1.75636	0.616824	1.22504	0.596789		1.97809	1.85509	1.1966	1.33429		1.75636	0.970012	1.22504	0.794269		1.69939	1.65754	1.424	1.28318			10				1.96893	0.937056	1.49715	0.846915		1.69972	1.65207	1.42274	1.36686		12	11	7	9
1.73996	0.65617	1.30456	0.432815		1.96701	1.80066	1.3023	1.35574		1.73996	0.991337	1.30456	0.750704		1.61913	1.71114	1.42458	1.41593							2.09298	0.942009	1.44674	0.692516		1.79824	1.64772	1.29969	1.19093		11	11	7	9
1.67912	0.62847	1.25517	0.63419		1.79364	1.56824	1.53904	1.29266		1.67912	0.935136	1.25517	0.701933		2.0945	1.4181	1.34193	1.29481							1.77654	0.990522	1.4703	0.732702		1.55811	1.39428	1.24748	1.33827			11	8	9
1.65336	0.646416	1.28439	0.61582		2.22166	1.81555	1.53027	1.33288		1.65336	1.07707	1.28439	0.802382		1.47151	1.83124	1.4074	1.20957							1.92405	0.89012	1.52628	0.803574		1.80981	1.87545	1.43423	1.45577			11	8	10
1.69657	0.63954	1.35566	0.455834		2.01524	1.65073	1.56414	1.20276		1.69657	0.927661	1.35566	0.838399		1.74108	1.86932	1.34148	1.48559							1.976	1.00563	1.52143	0.828564		1.82585	1.7493	1.32919	1.36009			12
1.68331	0.571222	1.21409	0.506995		1.92141	1.72133	1.30127	1.30253		1.68331	0.929592	1.21409	0.856633		1.53733	1.8302	1.31358	1.44542							1.97224	1.03839	1.45743	0.772286		1.64509	1.54474	1.4575	1.57197			13
1.68743	0.664682	1.26059	0.558864		1.74104	1.88858	1.33356	1.32868		1.68743	0.897429	1.26059	0.78854		1.75379	1.66184	1.32762	1.41018							1.92756	0.98717	1.54286	0.826293		1.44635	1.7607	1.27293	1.3417			12
1.84157	0.720037	1.43735	0.656617		1.63684	1.56928	1.39481	1.24292		1.84157	0.919486	1.43735	0.698166		1.61661	1.71502	1.40867	1.31894							1.9969	0.988911	1.48882	0.79406		1.97866	1.81725	1.29996	1.31986
1.77612	0.574663	1.28523	0.633995		1.92209	1.70521	1.43564	1.1882		1.77612	0.967185	1.28523	0.846731		1.83484	1.80741	1.26005	1.3074							1.98394	1.02186	1.59305	0.7912		1.62153	1.92996	1.34628	1.26356
1.72811	0.692063	1.36516	0.634881		1.65002	1.59742	1.43145	1.35652		1.72811	1.03647	1.36516	0.813036		2.11608	1.64301	1.41112	1.48607							2.04834	0.95467	1.45294	0.844605		1.81439	1.80584	1.3468	1.43513
1.58393	0.652012	1.24747	0.668497		1.70578	1.94399	1.35599	1.22075		1.58393	0.970751	1.24747	0.868849		1.65711	1.81895	1.30415	1.39306							1.98374	0.998328	1.49039	0.839144		1.533	1.77087	1.21838	1.30147
1.80144	0.655487	1.36097	0.63188		1.64292	1.69772	1.26921	1.34658		1.80144	0.973809	1.36097	0.857153		1.46624	1.6699	1.32378	1.35551							2.05704	1.00285	1.55285	0.755		1.58275	1.69783	1.24885	1.54387
1.72959	0.633037	1.17171	0.587894		1.6751	1.80248	1.20658	1.54663		1.72959	1.00172	1.17171	0.973815		1.69789	1.89234	1.40697	1.23912							1.93645	1.02101	1.47203	0.800917		1.68575	1.78394	1.28029	1.32708
1.69858	0.620641	1.31602	0.644748		1.62391	1.85507	1.23251	1.21056		1.69858	0.986696	1.31602	0.793179		2.03063	1.88305	1.14019	1.40879							1.91177	1.02178	1.54317	0.75739		1.63418	2.02313	1.37872	1.47673
1.76372	0.654905	1.31759	0.600081		1.69845	1.8103	1.35371	1.27521		1.76372	0.933597	1.31759	0.761597		1.73504	1.98915	1.28465	1.32862							1.90263	0.880948	1.45541	0.832958		1.81672	1.64278	1.51812	1.49285
1.53309	0.667794	1.16529	0.548383		1.95678	1.95015	1.43571	1.25519		1.53309	1.03719	1.16529	0.789873		1.40816	1.78003	1.22347	1.39646							1.91447	1.00543	1.5882	0.761236		1.57051	1.59864	1.28896	1.44769
1.69766	0.716247	1.36307	0.573111		1.76949	1.72346	1.30011	1.14432		1.69766	0.995435	1.36307	0.900426		1.59967	1.4077	1.33546	1.33253							1.91794	1.03547	1.56627	0.740358		1.51972	1.69729	1.4995	1.41988
1.68398	0.742822	1.27118	0.635122		2.0264	1.69271	1.39479	1.38311		1.68398	0.955486	1.27118	0.718609		1.92065	1.81696	1.25246	1.4118							2.11279	0.834033	1.54775	0.788285		1.78848	1.60069	1.29007	1.4454
1.78261	0.822695	1.25359	0.52731		1.88264	1.79609	1.38681	1.2396		1.78261	1.0427	1.25359	0.868333		1.77386	1.71197	1.31759	1.40456							1.85105	0.939938	1.54802	0.805127		1.80727	1.81434	1.301	1.19613
1.75673	0.656594	1.28971	0.542292		1.59673	1.6285	1.22284	1.2914		1.75673	1.07458	1.28971	0.817392		1.68508	1.81591	1.41916	1.37331							1.90022	1.0106	1.60659	0.831811		1.62018	1.64468	1.44085	1.4705
1.66725	0.626273	1.26073	0.542028		1.8154	1.76219	1.45983	1.12067		1.66725	1.07563	1.26073	0.836959		1.54258	1.63157	1.35384	1.28348							2.07082	0.950702	1.57392	0.818923		1.56396	1.63749	1.39878	1.36121
1.48599	0.640064	1.25872	0.536671		1.71356	1.3106	1.47958	1.15863		1.48599	0.981806	1.25872	0.843998		1.68724	1.70522	1.2741	1.36356							1.96571	1.02235	1.44516	0.824163		1.60009	1.77145	1.37963	1.45407
1.71839	0.625168	1.26327	0.494374		1.66137	1.70609	1.35713	1.30428		1.71839	0.964547	1.26327	0.773371		1.69841	1.78934	1.35551	1.43403							1.99217	0.967945	1.54723	0.879963		1.65389	1.65746	1.30322	1.37268
1.80683	0.579569	1.31322	0.73327		1.87258	1.76983	1.39347	1.34993		1.80683	1.0078	1.31322	0.922146		1.97982	1.90883	1.33542	1.53413							1.93549	0.963848	1.45361	0.773309		1.63503	1.59669	1.35674	1.36979
1.58354	0.566573	1.21996	0.695625		1.86634	1.6823	1.31833	1.31361		1.58354	1.01987	1.21996	0.817809		1.83962	1.65654	1.3974	1.36513							2.16471	0.901408	1.64897	0.746843		1.41476	1.93665	1.25749	1.43017
1.72349		1.39526	0.559245		1.87007	1.55237	1.27379	1.32538		1.72349	0.877102	1.39526	0.766923		1.80519	1.86339	1.32506	1.27958							1.96901	0.866981	1.38469	0.694496		1.65662	1.84404	1.35253	1.24809
1.58083		1.21174	0.573095		1.78282	1.77474	1.3518	1.29863		1.58083	0.958038	1.21174	0.763889		1.59556	1.88224	1.28329	1.41237							2.08459	0.96469	1.58802	0.792118		1.63773	1.69347	1.36051	1.23061
1.46567		1.20788	0.564119		1.67302	1.81539	1.29659	1.20141		1.46567	1.04529	1.20788	0.799025		1.85462	1.82701	1.38097	1.28185							1.94042	0.974857	1.59481	0.798383		1.82787	1.50086	1.30055	1.48299
1.70221		1.42967	0.605512		1.77687	1.74222	1.30345	1.22839		1.70221	0.944185	1.42967	0.885104		2.00508	1.82492	1.41646	1.39073							1.8601	0.935815	1.43884	0.775573		1.69878	1.57813	1.41628	1.52111
1.67409		1.20735	0.542601		1.73323	1.93387	1.78504	1.15965		1.67409	1.0597	1.20735	0.775299		1.76609	1.62603	1.34541	1.29516							2.05542	0.957529	1.52444	0.74916		1.48055	1.88239	1.33408	1.4531
1.70826		1.41027	0.513192		1.9589	1.88302	1.89498	1.30481		1.70826	1.13933	1.41027	0.935125		1.9874	1.84314	1.31718	1.38498							1.64972	1.00508	1.93866	0.762743		1.55775	1.64491	1.46541	1.31334
1.86722		1.34506	0.593017		1.77825	1.89372	1.51276	1.24994		1.86722	1.05993	1.34506	0.688639		1.71798	1.64898	1.40135	1.10881							1.93365	1.02332	1.54789	0.757108		1.70317	1.7072	1.32571	1.33445
1.68723		1.20987	0.587226		1.66418	1.84017	1.32661	1.26679		1.68723	1.01474	1.20987	0.813528		1.70409	1.61903	1.29309	1.19266							1.95043	0.954464	1.58132	0.814701		1.64091	1.75463	1.29975	1.49472
1.73784		1.22148	0.546233		2.02571	1.65994	1.64548	1.22554		1.73784	0.909165	1.22148	0.767557		1.95517	1.90724	1.38479	1.28023							1.92145	0.968792	1.61158	0.833031		1.56873	1.61433	1.55766	1.3073
1.8885		1.23774			2.03332	1.68488	1.41092	1.2625		1.8885	0.942002	1.23774	0.762071		1.70848	1.74783	1.37762	1.41937							2.08673	0.828811	1.46794	0.678132		1.68826	1.69763	1.2505	1.43213
1.62		1.41368			1.8198	1.76158	1.44176	1.29408		1.62	0.979554	1.41368	0.755119		1.92969	1.80097	1.47772	1.33462							1.93021	0.941087	1.47796	0.771391		1.62406	1.84117	1.23718	1.09837
1.67058		1.30721			1.59433	1.72628	1.41927	1.1802		1.67058	0.957782	1.30721	0.869846		1.90531	1.83944	1.46339	1.37856							1.98681	0.977436	1.45107	0.802887		1.65373	1.79022	1.22391	1.28747
1.50984		1.21467			1.90267	1.76009	1.3321	1.15626		1.50984	0.956165	1.21467	0.887396		1.55374	1.8001	1.33708	1.4381							1.98114	0.931021	1.5481			1.79586	1.78603	1.41703	1.42838
1.63633		1.25667			1.88892	1.6678	1.37864	1.1435		1.63633	1.00452	1.25667	0.785383		1.78348	1.70981	1.16751	1.44869								0.911688	1.57313			1.56739	1.79368	1.23561	1.45379
1.61519		1.41251			1.81015	1.85562	1.3111	0.996699		1.61519	0.978073	1.41251	0.77745		1.61822	1.79517	1.27583	1.4657								0.914325	1.57567			1.64451	1.76951	1.36999	1.24436
1.57348		1.22897			1.48283	1.78645	1.42095	1.26501		1.57348	1.02497	1.22897	0.92023		1.97194	1.7267	1.31252	1.36398								1.01355	1.58176			1.65645	1.51252	1.4376	1.42319
1.70452		1.32285			1.78154	1.66113	1.23567	1.17657		1.70452	1.11512	1.32285	0.778024		1.75341	1.81795	1.2731	1.26173								0.96111	1.5378			1.765	1.79104	1.33248	1.27606
1.75561		1.29198			1.94163	1.86881	1.52444	1.19255		1.75561	0.976707	1.29198	0.972446		1.61498	1.78869	1.26363	1.30763								1.01883	1.58053			1.61374	1.73483	1.27873	1.37174
1.69646		1.33593			1.4721	1.95834	1.25543	1.34911		1.69646	1.2026	1.33593	0.857927		1.5813	1.98712	1.31761	1.30346								0.902113	1.53085			1.58709	1.66798	1.31327	1.38286
1.66807		1.21607			1.76341	1.69846	1.24574	1.30306		1.66807	0.995176	1.21607	0.710602		1.54987	1.99926	1.26263	1.40144								0.978428	1.52771			1.71487	1.66404	1.37588	1.21077
1.50421		1.35543			1.77262	1.72013	1.3427	1.28139		1.50421	0.971244	1.35543			1.6611	1.89234	1.18522	1.45886								0.918042	1.43797			1.85496	1.60353	1.41625	1.3114
1.77895		1.40448			1.70339	1.85161	1.30099	1.14666		1.77895	0.958242	1.40448			1.73768	1.80185	1.16534	1.36326									1.42672			1.59995	1.46265	1.29064	1.3858
1.82786		1.27355			1.63061	2.02449	1.3221	1.17337		1.82786	1.00986	1.27355			1.7544	1.87781	1.41622	1.32455									1.45739			1.80843	1.45225	1.19227	1.47099
1.67888		1.45506			1.72215	1.65001	1.26233	1.23941		1.67888	0.922087	1.45506			1.60458	1.92893	1.48315	1.41483									1.51051			1.85691	1.69121	1.32454	1.3225
1.6527		1.22947			1.76158	1.67092	1.41121	1.28965		1.6527	1.13394	1.22947			1.72708	1.80686	1.22875	1.31912									1.56064			1.84999	1.67304	1.27373	1.36052
1.61331		1.26351			1.56618	1.62931	1.49491	1.17578		1.61331	1.23105	1.26351			1.7736	1.82516	1.40694	1.29433									1.53743			1.65404	1.83062	1.34125	1.28685
1.68171		1.26928			1.88209	1.57625	1.23032	1.23425		1.68171	1.07164	1.26928			1.90477	1.77825	1.23439	1.28811									1.62227			1.74302	1.79963	1.32039	1.25163
1.54445		1.40808			2.04105	1.77937	1.19632	1.28855		1.54445	1.0066	1.40808			1.99374	1.66725	1.34975	1.3766									1.49297			1.68752	1.77316	1.37588	1.19235
1.66557		1.25717			1.96164	1.84319	1.36142	1.28984		1.66557	1.02551	1.25717			1.622	1.86953	1.31185	1.52484												1.50675	1.438	1.24531	1.21128
1.73906		1.20362			1.88712	1.62714	1.21716	1.17013		1.73906		1.20362			1.57166	1.86699	1.4259													1.76987	1.68138	1.35315	1.30167
1.6899		1.45507			1.71637	1.61523	1.46832	1.20402		1.6899		1.45507			1.67871	1.85131	1.46519													1.50236	1.58057	1.45046	1.28786
1.90779		1.37124			1.94535	1.49064	1.17633	1.27684		1.90779		1.37124			1.82314	1.69926	1.19306													1.74242	1.83209	1.29334	1.28466
1.58491		1.41358			1.66341	1.74485	1.24375	1.16347		1.58491		1.41358			1.91484	1.83127														1.8602	1.53244	1.25238	1.41676
1.89174		1.26236			1.6882	1.79426	1.30178	1.28215		1.89174		1.26236			1.96413	1.92752														1.63592	1.71894	1.31527	1.15826
1.66285		1.18935			1.81377	1.56082	1.30564	1.19352		1.66285		1.18935			1.85823	1.82537														1.72867	1.6385	1.13353	1.34664
1.79816		1.26187			1.69436	1.64032	1.30249	1.30247		1.79816		1.26187			1.66161	2.00415														1.78032	1.46435	1.40209	1.31487
1.91049		1.20421			2.02492	1.6681	1.52413	1.1701		1.91049		1.20421			1.9962	1.72591														1.68899	2.17362	1.32339	1.25159
1.60004		1.35085			1.67798	1.60041	1.30619	1.13188		1.60004		1.35085			1.67257	1.83727														1.68391	1.61189	1.32668	1.40329
1.7678		1.24943			1.88901	1.71501	1.43747	1.14185		1.7678		1.24943			1.65536	1.74068														1.68473	1.55243	1.248	1.30825
1.72766		1.36146			1.76894	1.71219	1.41646	1.21311		1.72766		1.36146			1.77118	1.84988														1.75446	0.61366	1.40473	1.26671
1.74696		1.27018			1.82455	1.65161	1.26646	1.14503		1.74696		1.27018			1.8135	1.59569														1.6549	1.82666	1.40901	1.30864
1.7134		1.31254			1.71322	1.67958	1.47148	1.13469		1.7134		1.31254				1.74726														1.76077	1.90603	1.361	1.17923
1.65027		1.24938			1.64564	1.64704	1.24794	1.28201		1.65027		1.24938				1.84753														1.68642	2.01836	1.27799	1.36396
1.73103		1.23068			1.97158	1.42118	1.2978	1.23921		1.73103		1.23068				1.77415														1.81839	1.77945	1.3069	1.45792
1.71037		1.21836			1.85974	1.70984	1.26567	1.32659		1.71037		1.21836				1.79293														1.68662	1.65077	1.28164	1.4612
1.48036		1.45203			1.65612	1.75927	1.23664	1.25715		1.48036		1.45203				1.77151														1.68128	1.79363	1.49695	1.2699
1.64502		1.33751			1.7117	1.64859	1.30782	1.28581		1.64502		1.33751				1.91827														1.60764	1.72441	1.28955	1.48419
1.5151		1.26462			1.88488	1.46269	1.42052	1.18521		1.5151		1.26462				1.71968														1.7299	1.76584	1.49257	1.39585
1.52487		1.30608			1.76157	1.81844	1.32911	1.27383		1.52487		1.30608				2.01213														1.70424	1.80748	1.42664	1.31076
1.75365		1.36336			1.71117	1.73422	1.33341	1.2278		1.75365		1.36336				1.85685														1.7855	1.6286	1.36019	1.34114
1.56897		1.42791			1.72976	1.72332	1.27252	1.3979		1.56897		1.42791				1.76548														1.82909	1.69255	1.3272	1.14926
1.85385		1.17054			1.81428	1.65992	1.32738	1.16152		1.85385		1.17054				1.74659														1.67372	1.70633	1.27328	1.34646
1.71958		1.32039			1.69335	1.70103	1.29922	1.27383		1.71958		1.32039																		1.55736	1.82214	1.31822	1.30917
1.63865		1.35058			1.85723	1.64466	1.58875	1.23167		1.63865		1.35058																		1.63509	1.62332	1.42629	1.22995
1.68519		1.27956			1.61875	1.5772	1.33228	1.13101		1.68519		1.27956																		1.56784	1.65748	1.33713	1.29232
1.66328		1.37938			1.87103	1.76286	1.11983	1.20123		1.66328		1.37938																		1.76235	1.87513	1.37109	1.18699
1.65752		1.19985			1.73119	1.83711	1.30142	1.36352		1.65752		1.19985																		1.61567	1.54178	1.23774	1.22071
1.71751		1.26741			1.75056	1.69626	1.41277	1.22688		1.71751		1.26741																		1.59099	1.99651	1.24464	1.44354
1.61851		1.33365			1.79442	1.88513	1.36975	1.25516		1.61851		1.33365																		1.44719	1.76936	1.44371	1.221
1.59507		1.21409			1.76653	1.56455	1.31959	1.47477		1.59507		1.21409																		1.40625	1.46425	1.32013	1.21948
1.5355		1.17571			1.64957	1.58171	1.32027	1.07202		1.5355		1.17571																		1.7572	1.64691	1.31643	1.28399
1.72461		1.30221			1.82303	1.71721	1.72905			1.72461		1.30221																		1.8872	1.43175	1.36195	1.35755
1.71035		1.36257			1.65097	1.6218	1.42986			1.71035		1.36257																		1.75959	1.85738	1.22599	1.39598
1.6459		1.28626			1.74616	1.77409	1.33404			1.6459		1.28626																		1.66771	1.66148	1.39533	1.36414
1.66852		1.34511			1.64759	1.75072	1.39672			1.66852		1.34511																		1.57196	1.60274	1.24281	1.23976
1.5413		1.2646			1.88454	1.73752	1.22963			1.5413		1.2646																		1.86685	1.71185	1.22492	1.36498
1.62107		0.98512			1.89688	1.57693	1.21267			1.62107		0.98512																		1.85495	1.52854	1.38462	1.30397
1.77814		1.30417			1.61386	1.61933	1.25011			1.77814		1.30417																		1.81936	1.76903	1.36877	1.16527
1.77788		1.29152			1.99479	1.6153	1.47426			1.77788		1.29152																		1.62826	1.91867	1.33713	1.22418
1.79589		1.36314			1.88143	1.60174	1.27091			1.79589		1.36314																		1.48706	1.59894	1.33723	1.47552
1.67169		1.31313			1.94479	1.91446	1.11226			1.67169		1.31313																		1.94255	1.80464	1.274	0.992823
1.60882		1.31428			1.8489		1.37916			1.60882		1.31428																		1.72963	1.69973	1.24353	1.2338
1.71272		1.35545			1.79434		1.35749			1.71272		1.35545																		1.78057	1.73258	1.20591	1.28925
1.56889		1.29039			1.83754		1.3615			1.56889		1.29039																		1.58263	1.62683	1.40206	1.39856
1.60953		1.27397			1.97255		1.26162			1.60953		1.27397																		1.62315	1.76519	1.44547	1.3721
1.69596		1.32238			1.62623		1.35563			1.69596		1.32238																		1.64587	1.64095	1.35233	1.34582
1.86171		1.22528			1.75823		1.41466			1.86171		1.22528																		1.75238	1.68351	1.27478	1.27879
1.71549		1.34115			1.66655		1.45325			1.71549		1.34115																		1.46724	1.79737	1.33426	1.3431
1.61199		1.41382			1.75698		1.20121			1.61199		1.41382																		1.68039	1.70127		1.2325
1.658		1.33694			2.002		1.40186			1.658		1.33694																		1.53304	1.62006		1.53878
1.85492		1.23574			1.63491		1.3112			1.85492		1.23574																		1.69742	1.53007		1.30456
1.78078		1.27511			1.91408		1.36311			1.78078		1.27511																		1.78043	1.72019		1.45908
1.57174		1.21405			1.64398		1.2174			1.57174		1.21405																		1.82482	1.67876		1.2541
1.67567		1.26558			1.9235					1.67567		1.26558																		1.76389	1.8453		1.33564
1.72221		1.17524			1.32767					1.72221		1.17524																		1.878	1.86799		1.13099
1.64398					1.79902					1.64398																				1.68602	1.91106		1.1556
1.6674					1.78353					1.6674																				1.66785	1.61553		1.19162
1.7698					1.85501					1.7698																				2.09598	1.63059		1.26713
1.65169					1.95039					1.65169																					1.51758		1.02888
1.57516					1.67027					1.57516																					1.73246		1.32075
1.60187					2.14473					1.60187																					1.66182		1.13738
1.59879					1.68373					1.59879																					1.64506		1.37613
1.69978					1.77591					1.69978																					1.91722		1.23075
1.65992					1.93781					1.65992																					1.58809		1.199
1.69679					1.7037					1.69679																					1.70097
1.71123					1.89025					1.71123																					1.58736
1.64774					1.50708					1.64774																					1.61865
1.68469					1.76012					1.68469																					1.77134
1.79629					2.12239					1.79629																					1.74232
1.63272					1.80317					1.63272																					1.61171
1.59928					1.66827					1.59928																					1.7922
																															1.54313
																															1.62542
																															1.63554
																															1.69168
																															1.636
																															1.59243
																															1.95589
																															1.69889
																															1.92825
																															1.6975
																															1.56867
																															1.835
																															1.64544
																															1.70729
																															1.71971
																															1.65547
																															1.40862
																															1.62784
																															1.6511
																															1.74168
